# Supplementary material for: Intracellular pH sensing using polymeric micelle containing tetraphenylethylene-oxazolidine
Source: Royal Society of Chemistry journal article supplement (doi:10.1039/c6py01072e), 2016-01-01
Supplement: c6py01072e1.pdf [file c6py01072e1.pdf]

Supporting Information (SI)

## Intracellular pH Sensing Using Polymeric Micelle Containing Tetraphenylethylene-Oxazolidine

Qingkai Qi,<sup>a</sup> Yue Li,<sup>b</sup> Xiaoyu Yan,<sup>c</sup> Fengli Zhang,<sup>a</sup> Shan Jiang,<sup>a</sup> Jing Su,<sup>c</sup> Bin Xu,<sup>\*a</sup>

Xueqi Fu,<sup>b</sup> Liankun Sun<sup>c</sup> and Wenjing Tian<sup>\*a</sup>

<sup>a</sup>State Key Laboratory of Supramolecular Structure and Materials, College of Chemistry, Jilin University, Changchun 130012, P. R. China

<sup>b</sup>Edmond H. Fischer Signal Transduction Laboratory, College of Life Sciences, Jilin University, Changchun 130012, P. R. China

<sup>c</sup>Department of Pathophysiology, Basic Medical College, Jilin University, Changchun 130021, P. R. China

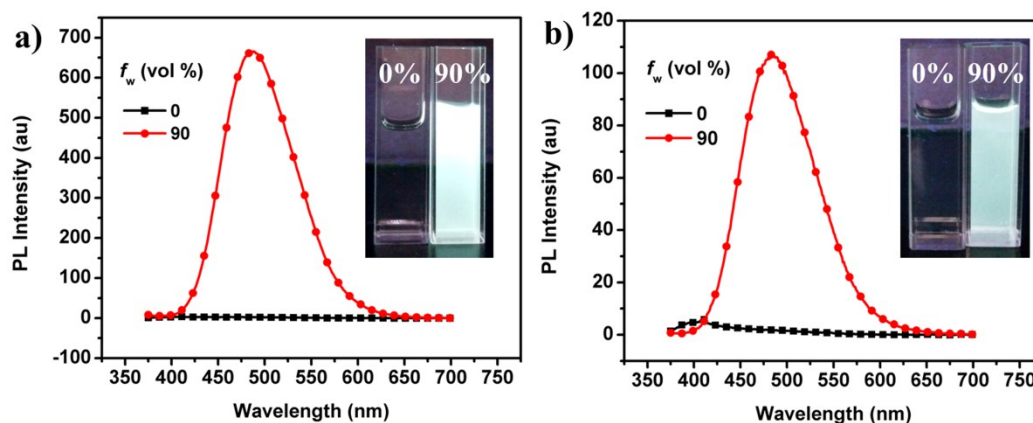

**Figure S1.** PL spectra of a) monomer **7** and b) copolymer **8** in THF-H<sub>2</sub>O mixtures with 0% and 90% water fractions ( $f_w$ ). Solution concentration:  $1 \times 10^{-5}$  M. Insets: corresponding fluorescence images under (365 nm) UV light.

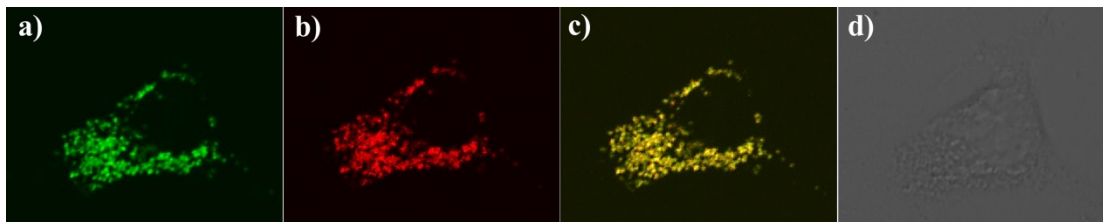

**Figure S2.** The enlarged confocal images of a single HepG2 cell stained with a) 0.1  $\mu\text{M}$  LysoTracker Green DND-26 (LTG) and b) 50  $\mu\text{g/mL}$  polymeric micelles. c) panels a) and b) merged, d) bright-field. Scale bar: 20  $\mu\text{m}$ .

### $^1\text{H}$ NMR, $^{13}\text{C}$ NMR, MS spectra and GPC data of the compounds

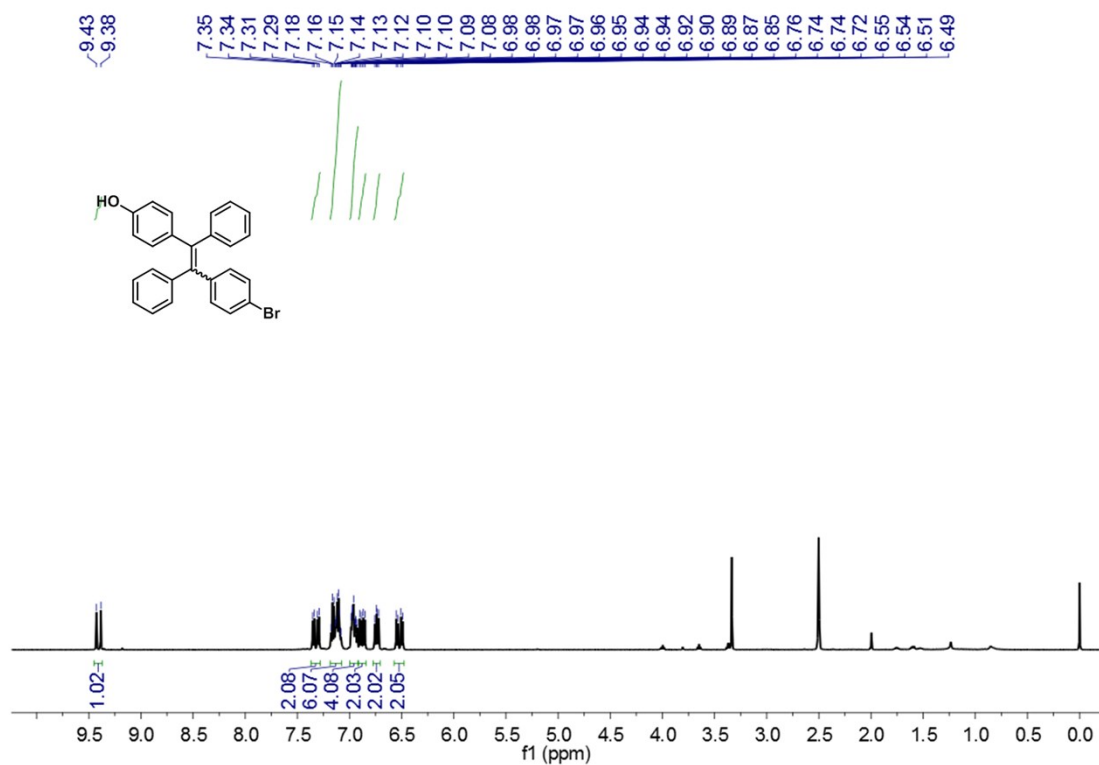

**Figure S3.**  $^1\text{H}$  NMR spectrum of compound 1 in  $\text{CDCl}_3$ .

2015111601 #239 RT: 3.13 AV: 1 NL: 1.14E6  
T: + c Full ms [50.00-1000.00]

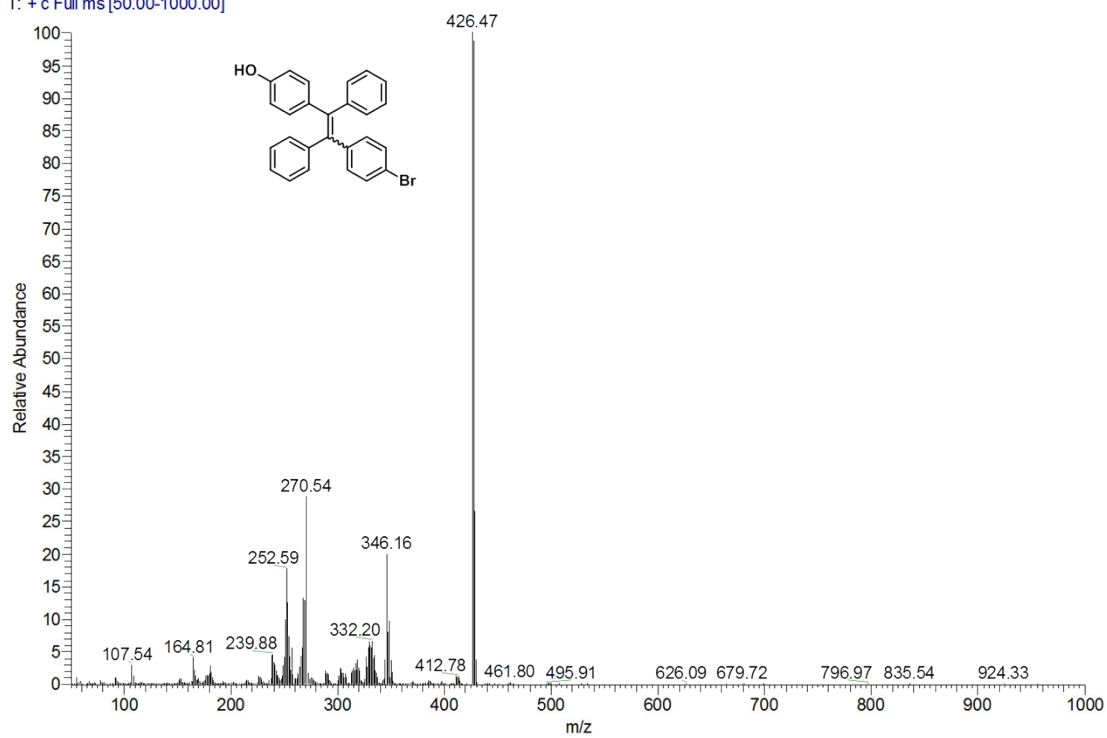

Figure S4. Mass spectrum of compound 1.

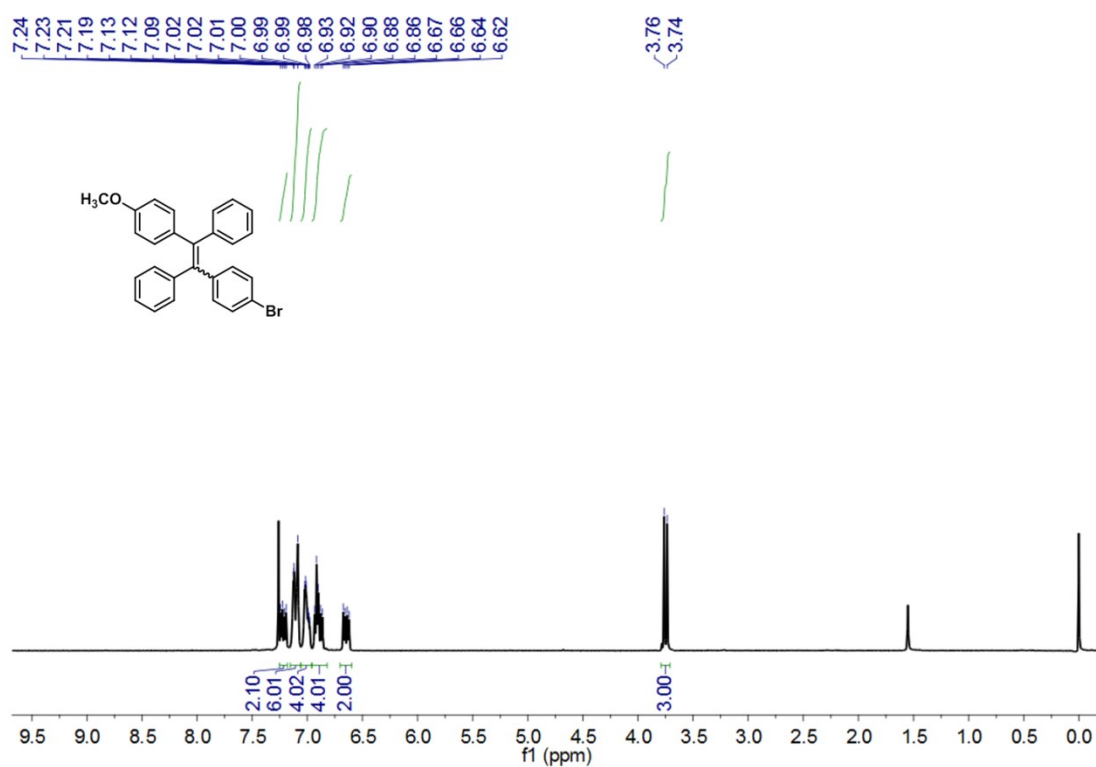

Figure S5. <sup>1</sup>H NMR spectrum of compound 2 in CDCl<sub>3</sub>.

2015111602 #185 RT: 2.46 AV: 1 NL: 3.04E5  
T: + c Full ms [50.00-1000.00]

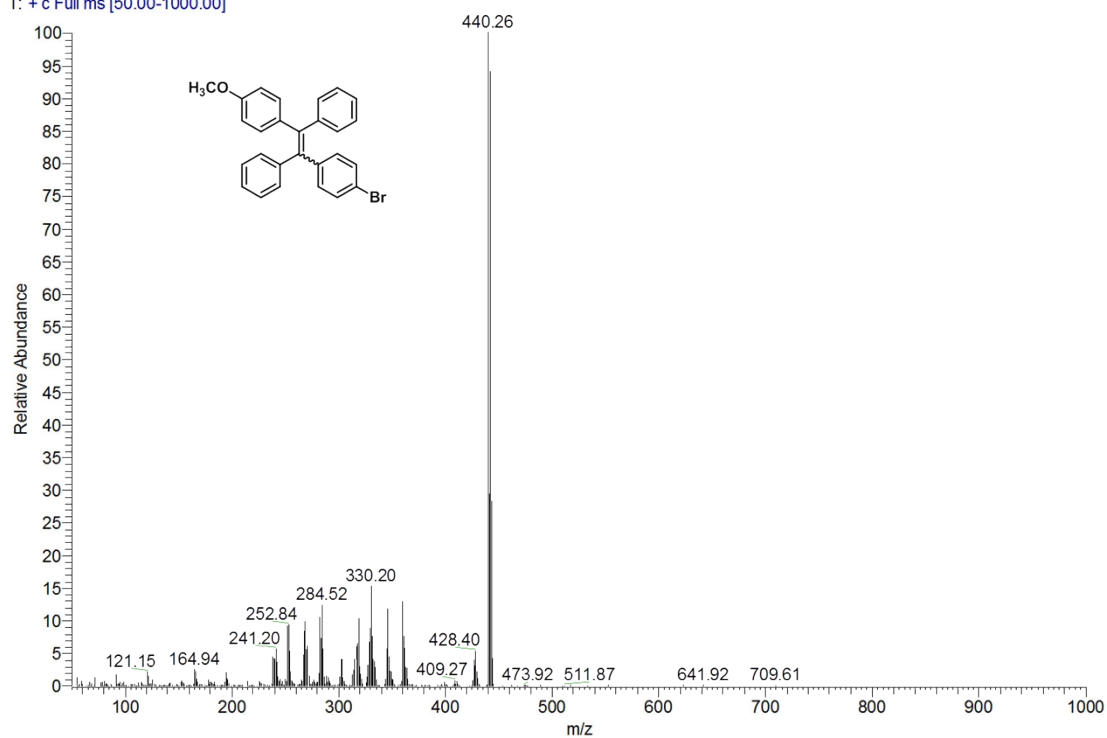

Figure S6. Mass spectrum of compound 2.

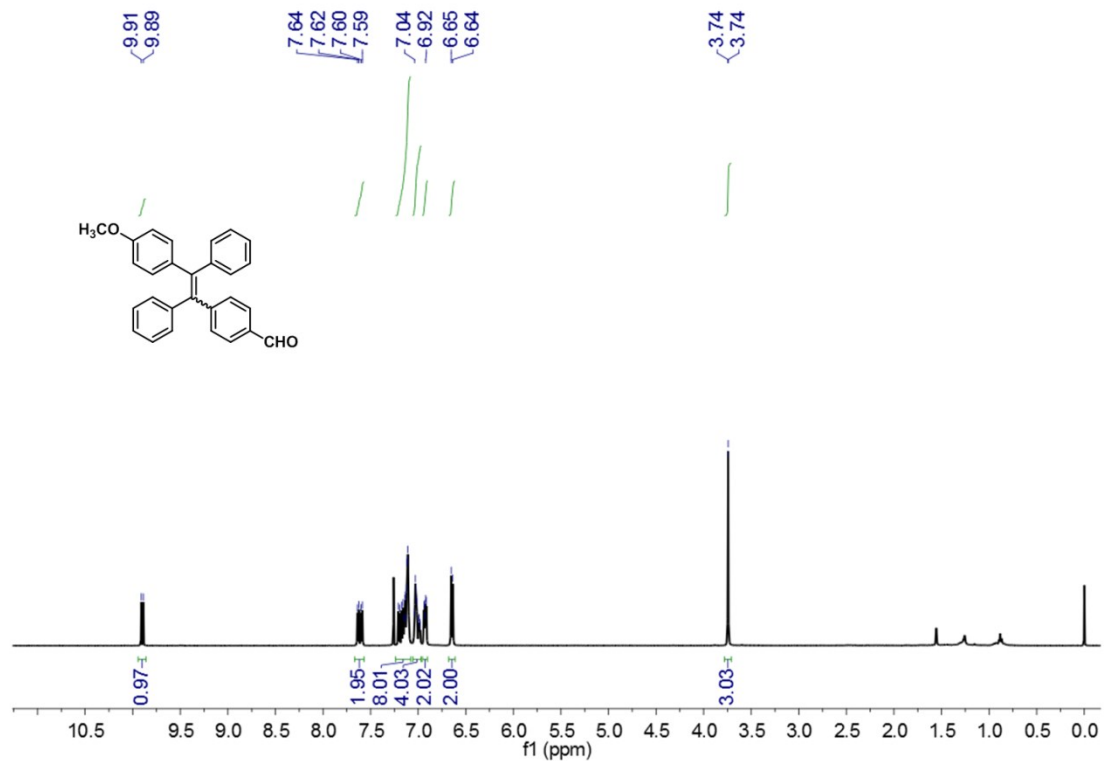

Figure S7. <sup>1</sup>H NMR spectrum of compound 3 in CDCl<sub>3</sub>.

2015121803 #166 RT: 2.17 AV: 1 NL: 6.62E5  
T: + c Full ms [50.00-1000.00]

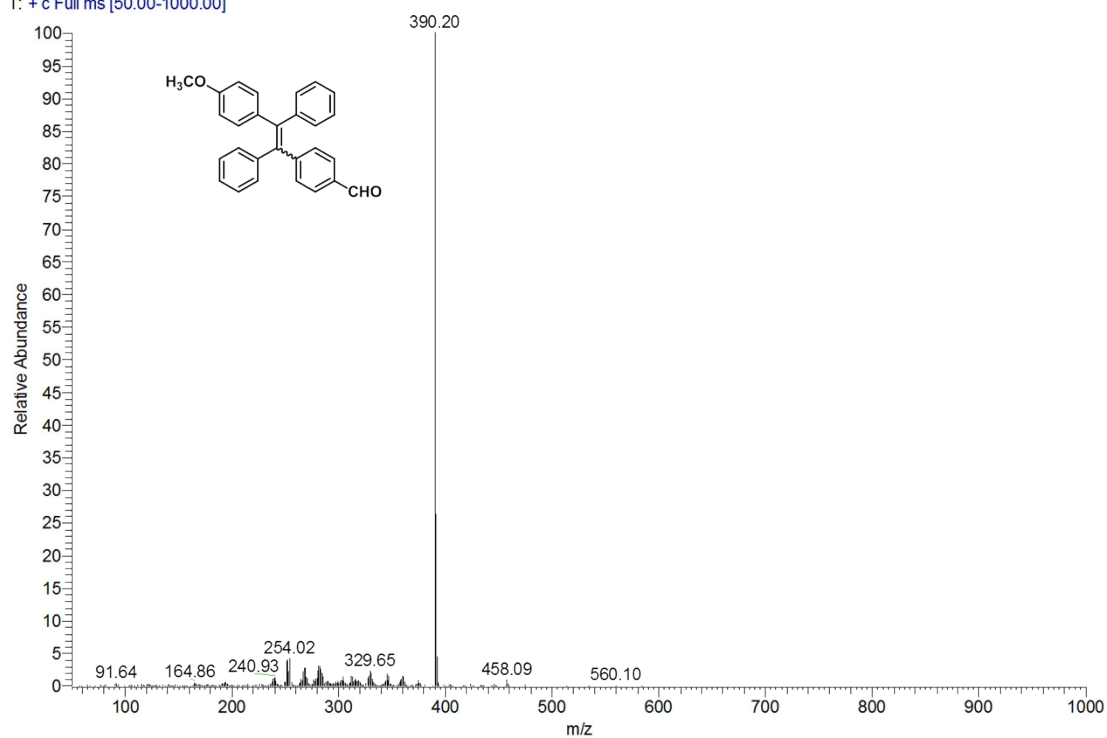

Figure S8. Mass spectrum of compound 3.

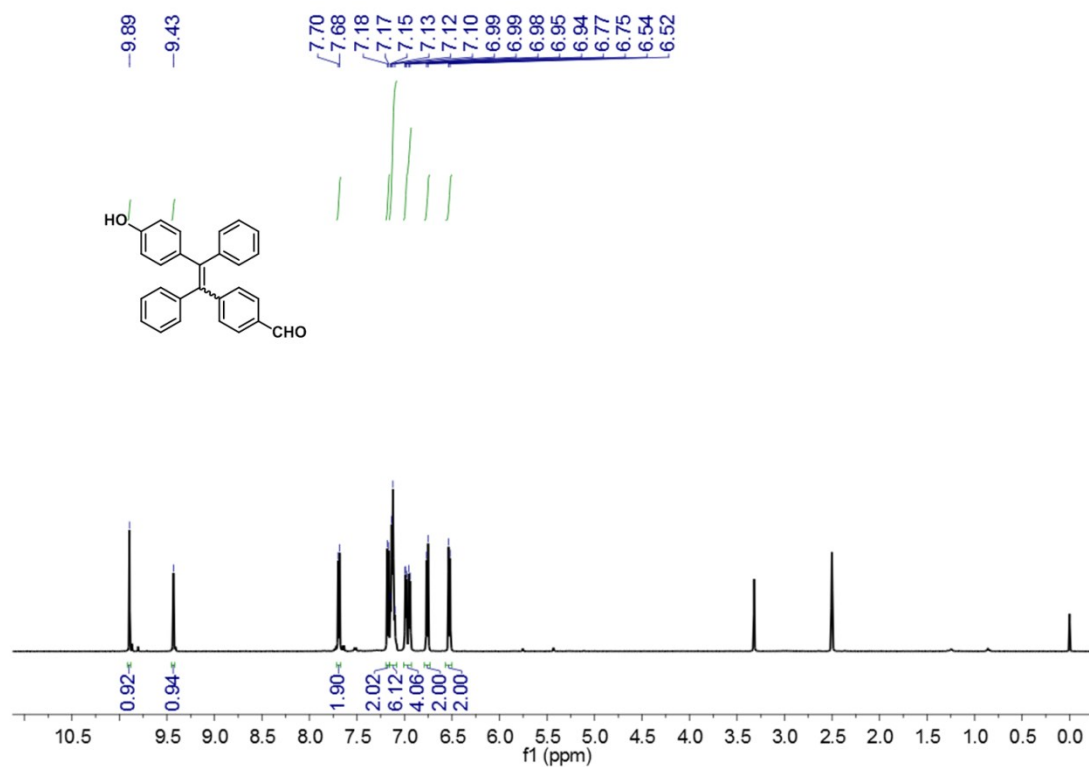

Figure S9. <sup>1</sup>H NMR spectrum of compound 4 in CDCl<sub>3</sub>.

2015121802 #236 RT: 3.10 AV: 1 NL: 4.29E5  
T: + c Full ms [50.00-1000.00]

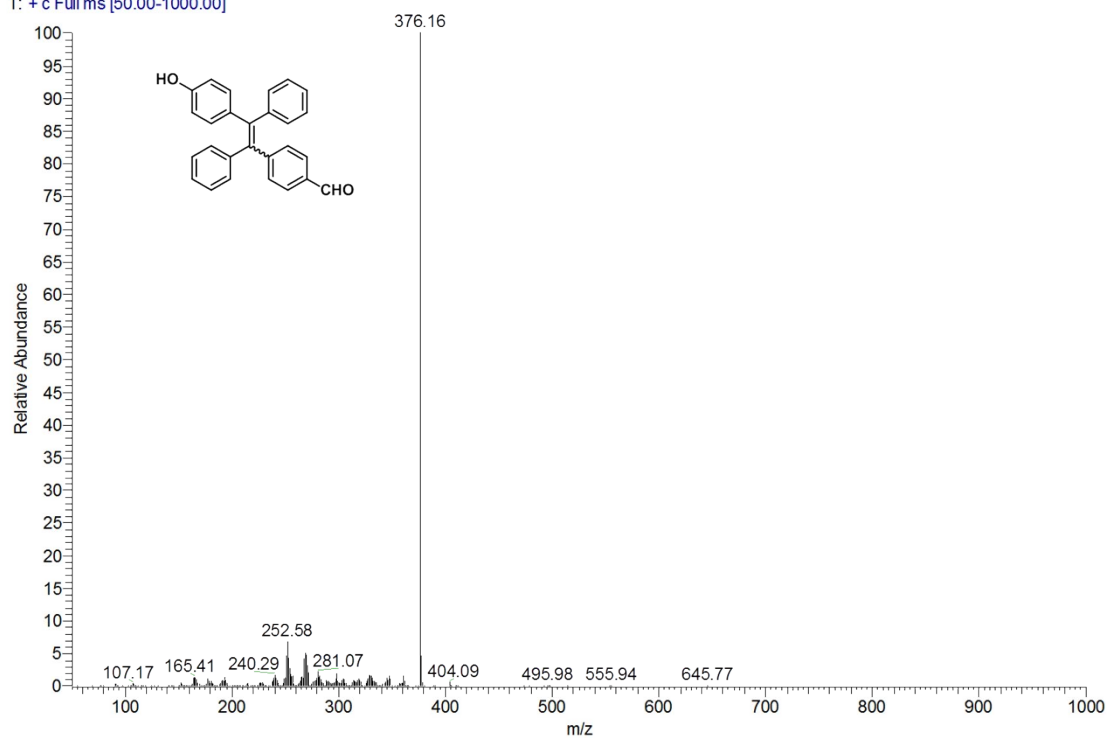

Figure S10. Mass spectrum of compound 4.

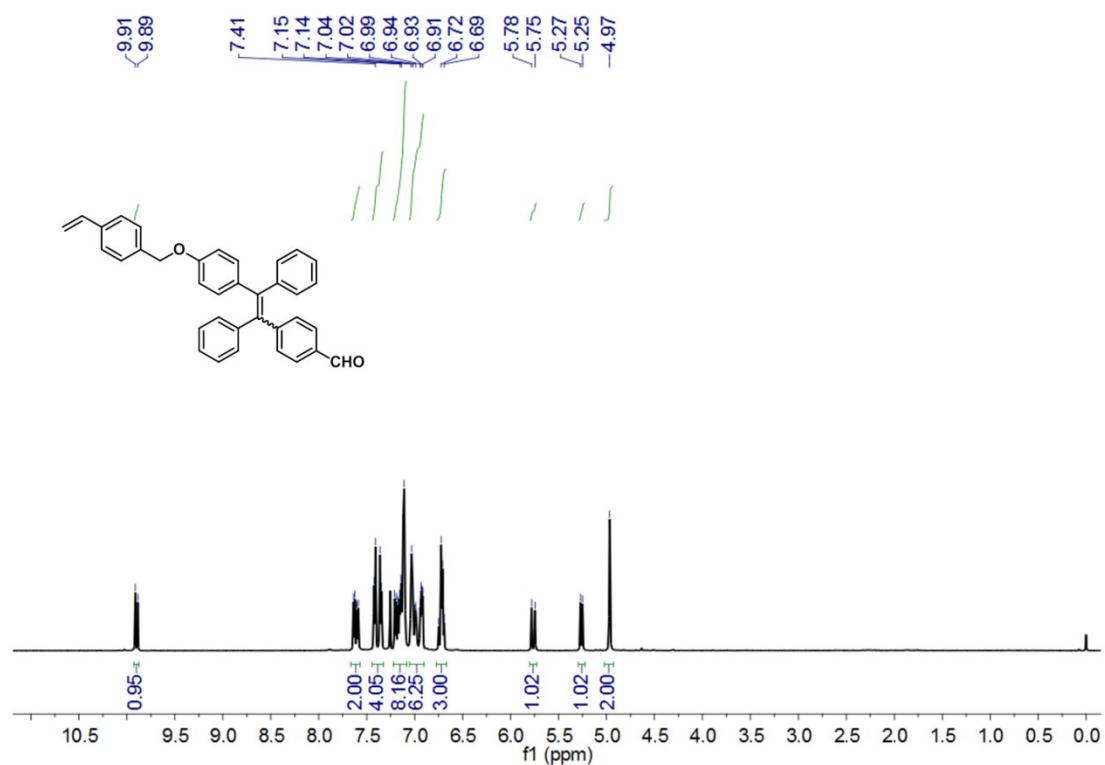

Figure S11. <sup>1</sup>H NMR spectrum of compound 5 in CDCl<sub>3</sub>.

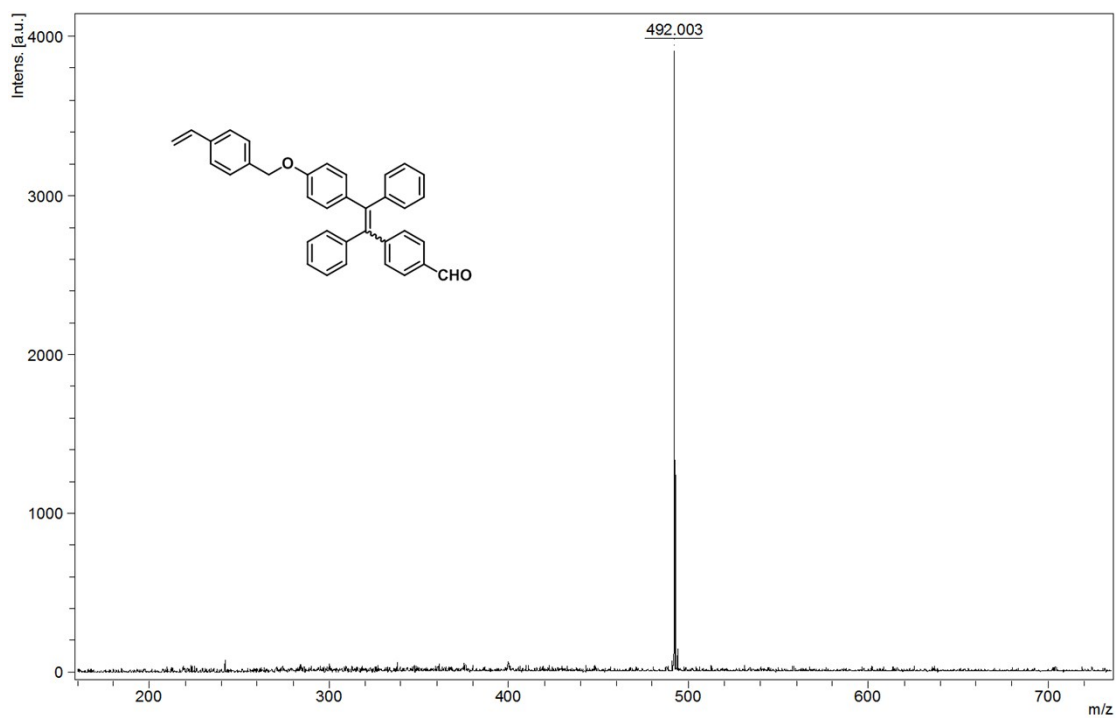

**Figure S12.** Mass spectrum of compound 5.

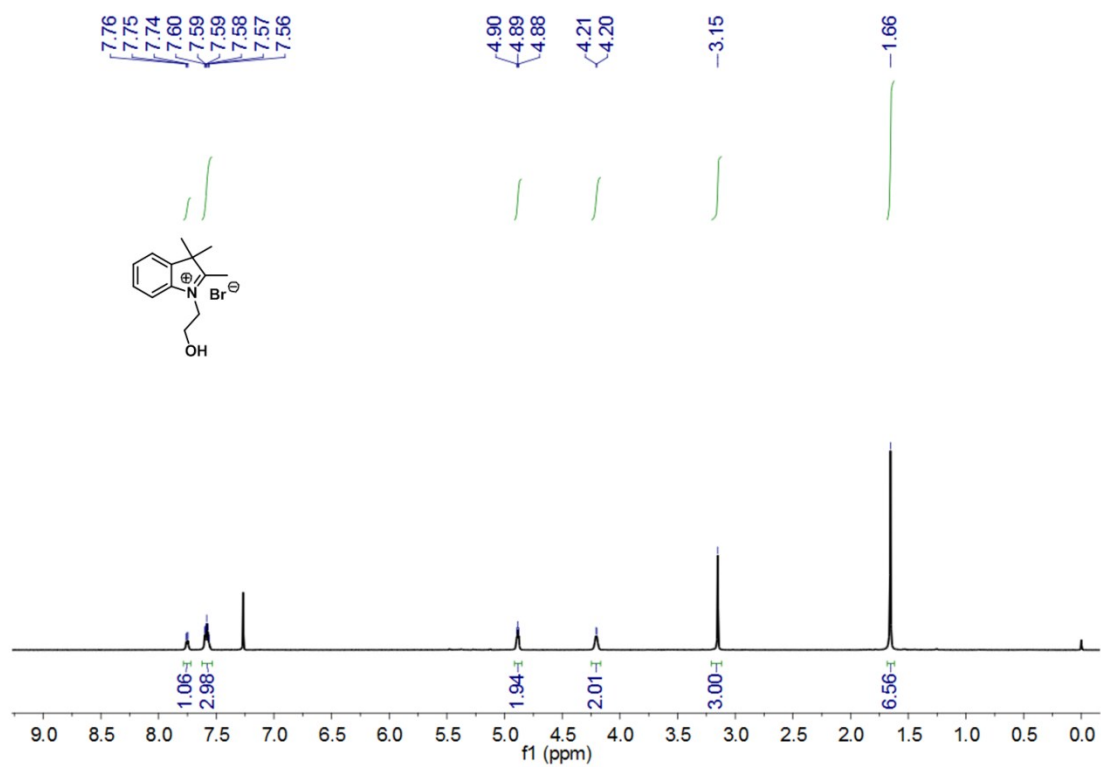

**Figure S13.** <sup>1</sup>H NMR spectrum of compound 6 in CDCl<sub>3</sub>.

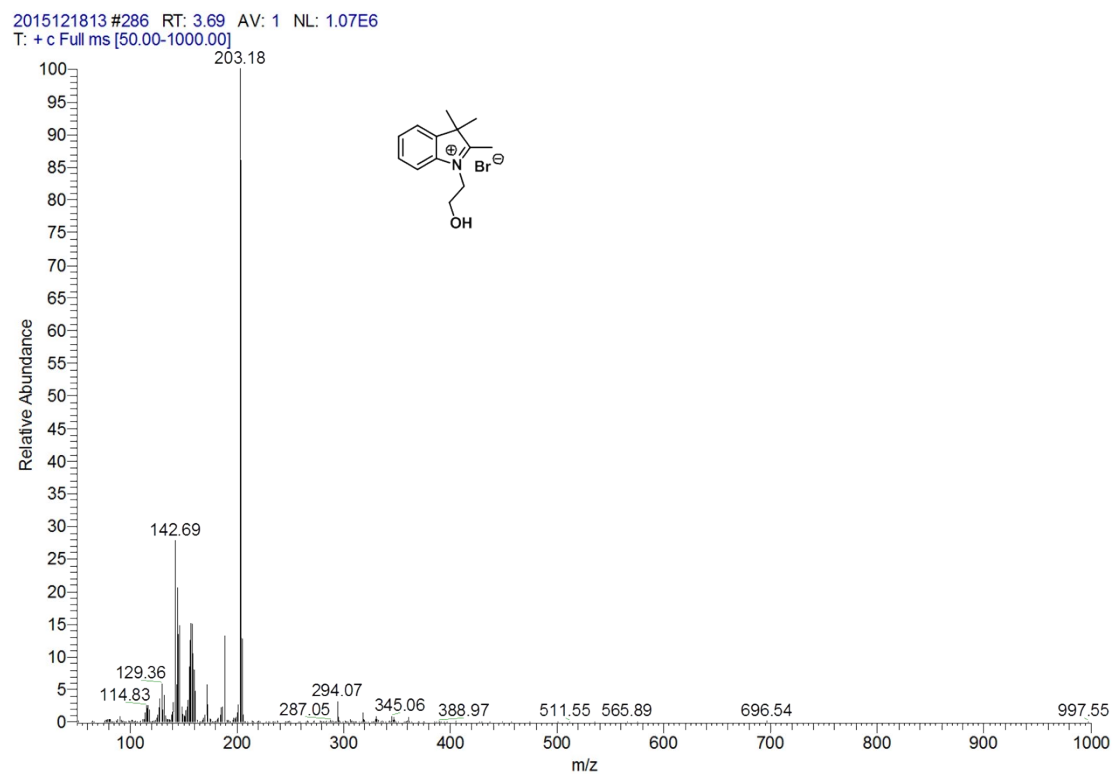

Figure S14. Mass spectrum of compound 6.

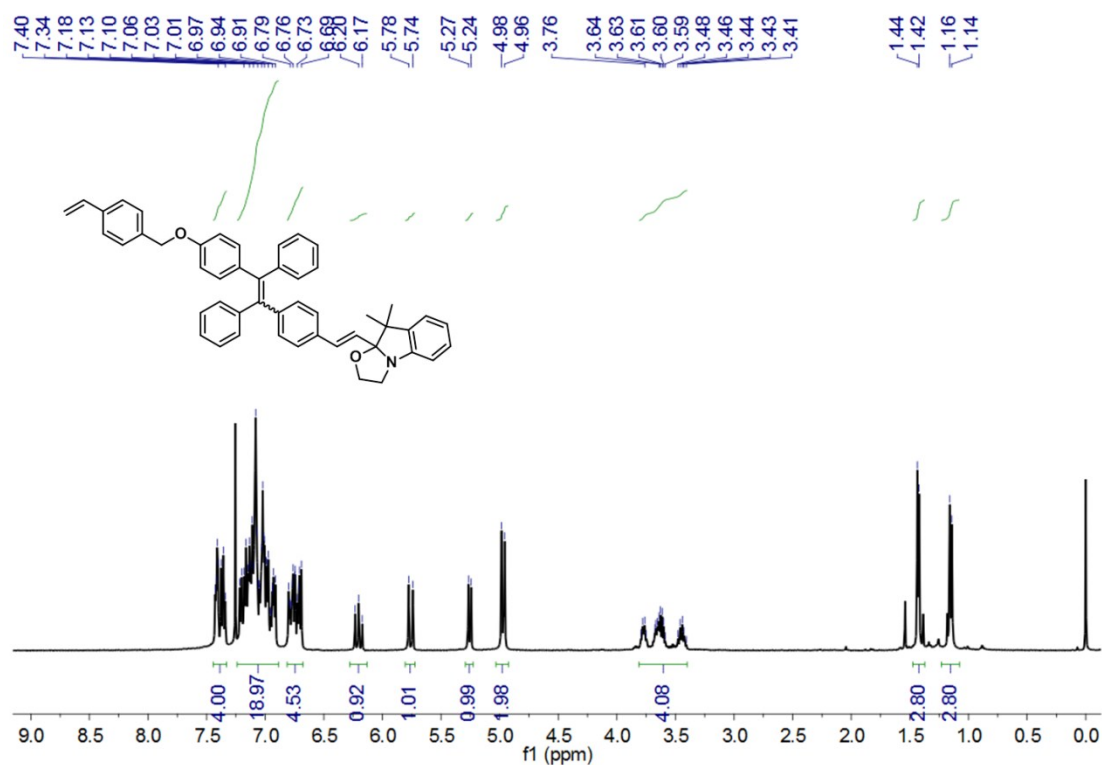

Figure S15. <sup>1</sup>H NMR spectrum of compound 7 in CDCl<sub>3</sub>.



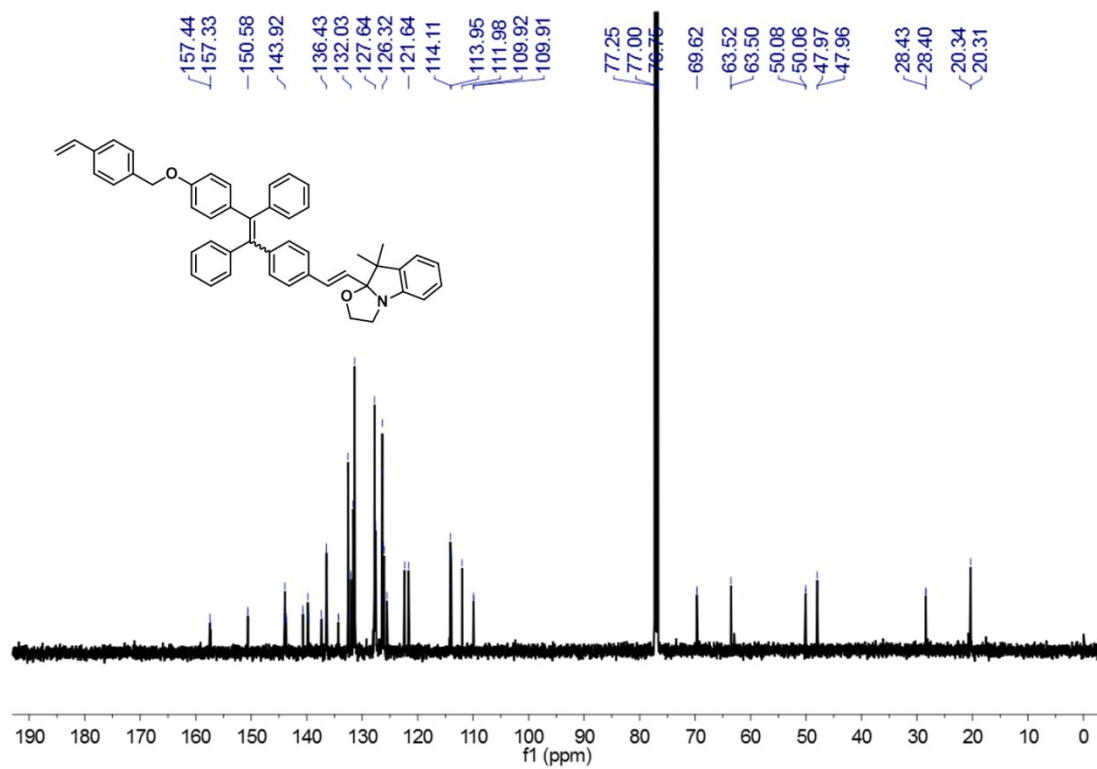

**Figure S16.**  $^{13}\text{C}$  NMR spectrum of compound **7** in  $\text{CDCl}_3$ .

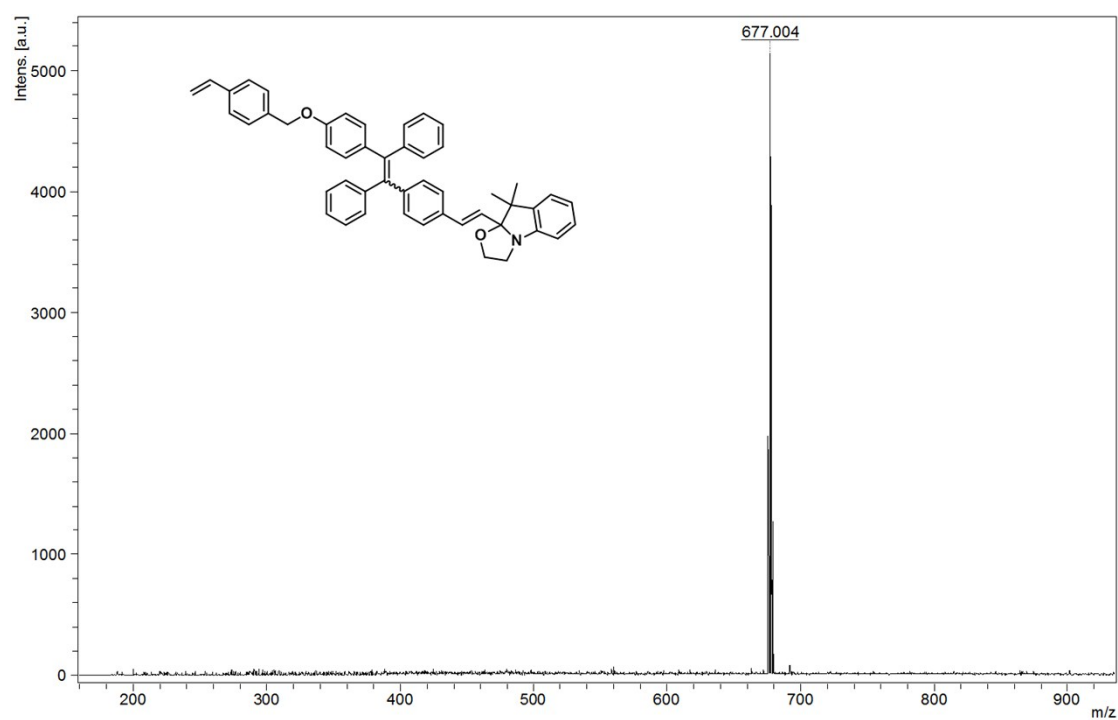

**Figure S17.** Mass spectrum of compound **7**.

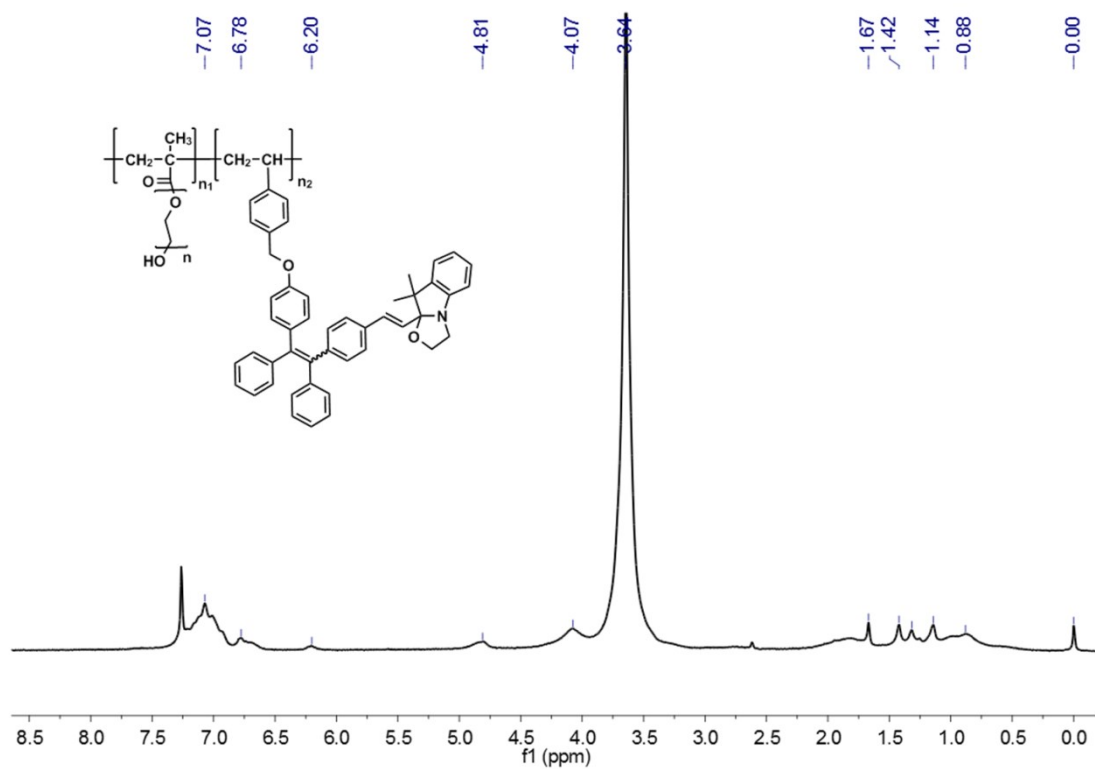

**Figure S18.**  $^1\text{H}$  NMR spectrum of copolymer **8** in  $\text{CDCl}_3$ .

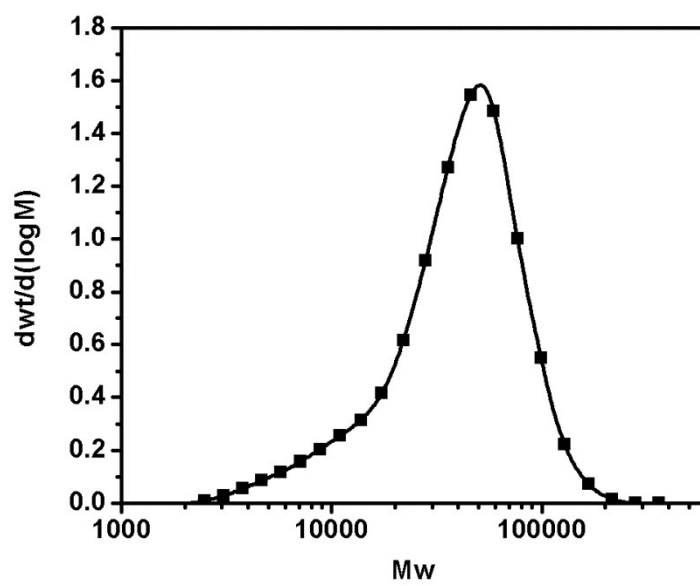

**Figure S19.** GPC chart of copolymer **8** (eluent: DMF).
